# Supplementary material for: Complement gene variants in relation to autoantibodies to beta cell specific antigens and type 1 diabetes in the TEDDY Study
Source: PubMed Central journal article supplement (PMC4910045; doi:10.1038/srep27887), 2016-06-16
Supplement: srep27887-s1.pdf [file srep27887-s1.pdf]

*Online Appendix. The explicit values of the HR (95%CI) for type 1 diabetes in the HLA stratified analyses presented in Figure 1 in:*

*Complement gene variants in relation to autoantibodies to beta cell specific antigens and type 1 diabetes in the TEDDY Study*

Carina Törn<sup>1</sup>, Xiang Liu<sup>2</sup>, William Hagopian<sup>3</sup>, Åke Lernmark<sup>1</sup>, Olli Simell<sup>4</sup>, Marian Rewers<sup>5</sup>, Anette-G Ziegler<sup>6</sup>, Desmond Schatz<sup>7</sup>, Beena Akolkar<sup>8</sup>, Suna Onengut-Gumuscu<sup>9</sup>, Wei-Min Chen<sup>9</sup>, Jorma Toppari<sup>4,10</sup>, Juha Mykkänen<sup>4, 10</sup>, Jorma Ilonen<sup>10</sup>, Stephen S Rich<sup>9</sup>, Jin-Xiong She<sup>11</sup>, Ashok Sharma<sup>11</sup>, Andrea Steck<sup>5</sup>, Jeffrey Krischer<sup>2</sup> and the TEDDY Study Group\*.

1 Department of Clinical Sciences, Lund University/CRC, Malmö, Sweden

2 Health Informatics Institute, Morsani College of Medicine, University of South Florida, Tampa, FL, USA

3 Pacific Northwest Diabetes Research Institute, Seattle, WA, USA

4 Department of Pediatrics, Turku University Hospital, Turku, Finland

5 Barbara Davis Center for Childhood Diabetes, University of Colorado, Aurora, CO, USA

6 Institute of Diabetes Research, Helmholtz Zentrum, München, and Klinikum rechts der Isar, Technische Universität München, and Forschergruppe Diabetes e. V., Neuherberg, Germany

7 Department of Pediatrics, University of Florida, Gainesville, FL, USA

8 National Institutes of Diabetes & Digestive & Kidney Disorders, Bethesda, MD, USA

9 Center for Public Health Genomic, University of Virginia, Charlottesville, VA, USA

10 Departments of Physiology and Pediatrics, University of Turku, Turku, Finland

11 Center for Biotechnology and Genomic Medicine, Medical College of Georgia, Augusta University, Augusta, GA, USA

| HLA   | SNP          | ProbChisq | HazardRatio | HRLowerCL | HRUpperCL |
|-------|--------------|-----------|-------------|-----------|-----------|
| DR3/3 | rs1048971_A  | 0.7345    | 0.856       | 0.348     | 2.106     |
| DR3/3 | rs10818488_A | 0.9489    | 1.023       | 0.516     | 2.025     |
| DR3/3 | rs1143678_A  | 0.9724    | 0.983       | 0.370     | 2.611     |
| DR3/3 | rs1143679_A  | 0.9110    | 0.936       | 0.292     | 2.999     |
| DR3/3 | rs1143683_A  | 0.9525    | 0.971       | 0.364     | 2.587     |
| DR3/3 | rs17615_A    | 0.8670    | 0.930       | 0.400     | 2.166     |
| DR3/3 | rs2230199_C  | 0.1924    | 0.477       | 0.156     | 1.452     |
| DR3/3 | rs2857009_C  | 0.7172    | 0.679       | 0.083     | 5.521     |
| DR3/3 | rs4308977_G  | 0.8792    | 0.937       | 0.403     | 2.176     |
| DR3/3 | rs4597342_A  | 0.6244    | 1.170       | 0.625     | 2.190     |
| DR3/3 | rs4844573_G  | 0.1146    | 1.866       | 0.860     | 4.050     |
| DR3/3 | rs665691_C   | 0.8336    | 0.918       | 0.413     | 2.040     |
| DR3/3 | rs7029078_G  | 0.6136    | 1.199       | 0.593     | 2.427     |
| DR3/3 | rs7951_A     | 0.4930    | 0.620       | 0.158     | 2.435     |
| DR3/3 | rs9332739_C  | <.0001    | 0.000       | 0.000     | 0.000     |
| DR3/4 | rs1048971_A  | 0.1684    | 1.283       | 0.900     | 1.828     |
| DR3/4 | rs10818488_A | 0.5967    | 1.089       | 0.794     | 1.494     |
| DR3/4 | rs1143678_A  | 0.3863    | 0.796       | 0.474     | 1.335     |
| DR3/4 | rs1143679_A  | 0.1495    | 0.640       | 0.349     | 1.174     |
| DR3/4 | rs1143683_A  | 0.3837    | 0.795       | 0.474     | 1.333     |
| DR3/4 | rs17615_A    | 0.0252    | 1.524       | 1.054     | 2.204     |
| DR3/4 | rs2230199_C  | 0.3396    | 1.228       | 0.806     | 1.871     |
| DR3/4 | rs2857009_C  | 0.5509    | 1.150       | 0.726     | 1.820     |
| DR3/4 | rs4308977_G  | 0.0588    | 1.425       | 0.987     | 2.058     |
| DR3/4 | rs4597342_A  | 0.7997    | 1.047       | 0.735     | 1.491     |
| DR3/4 | rs4844573_G  | 0.0169    | 0.628       | 0.429     | 0.920     |
| DR3/4 | rs665691_C   | 0.3754    | 1.173       | 0.824     | 1.668     |
| DR3/4 | rs7029078_G  | 0.6646    | 1.082       | 0.757     | 1.548     |
| DR3/4 | rs7951_A     | 0.9486    | 0.979       | 0.518     | 1.851     |
| DR3/4 | rs9332739_C  | 0.6070    | 1.203       | 0.595     | 2.433     |
| DR4/4 | rs1048971_A  | 0.9738    | 1.011       | 0.541     | 1.886     |
| DR4/4 | rs10818488_A | 0.0733    | 1.675       | 0.952     | 2.945     |
| DR4/4 | rs1143678_A  | 0.8365    | 0.925       | 0.442     | 1.935     |
| DR4/4 | rs1143679_A  | 0.3145    | 0.571       | 0.192     | 1.702     |
| DR4/4 | rs1143683_A  | 0.8341    | 0.924       | 0.442     | 1.933     |
| DR4/4 | rs17615_A    | 0.5713    | 0.812       | 0.394     | 1.671     |
| DR4/4 | rs2230199_C  | 0.0002    | 3.200       | 1.750     | 5.851     |
| DR4/4 | rs2857009_C  | 0.9028    | 0.957       | 0.472     | 1.942     |
| DR4/4 | rs4308977_G  | 0.8859    | 0.952       | 0.489     | 1.856     |
| DR4/4 | rs4597342_A  | 0.9653    | 0.986       | 0.512     | 1.898     |
| DR4/4 | rs4844573_G  | 0.5362    | 1.216       | 0.654     | 2.262     |
| DR4/4 | rs665691_C   | 0.8878    | 1.041       | 0.596     | 1.820     |
| DR4/4 | rs7029078_G  | 0.3024    | 1.389       | 0.744     | 2.593     |
| DR4/4 | rs7951_A     | 0.8911    | 0.922       | 0.286     | 2.966     |
| DR4/4 | rs9332739_C  | 0.6760    | 1.190       | 0.526     | 2.691     |
| DR4/8 | rs1048971_A  | 0.9820    | 1.009       | 0.455     | 2.236     |
| DR4/8 | rs10818488_A | 0.8802    | 0.939       | 0.417     | 2.118     |
| DR4/8 | rs1143678_A  | 0.7783    | 0.871       | 0.334     | 2.273     |
| DR4/8 | rs1143679_A  | 0.6221    | 0.756       | 0.249     | 2.297     |

|       |             |        |       |       |       |
|-------|-------------|--------|-------|-------|-------|
| DR4/8 | rs1143683_A | 0.7716 | 0.867 | 0.332 | 2.266 |
| DR4/8 | rs17615_A   | 0.9519 | 0.975 | 0.428 | 2.219 |
| DR4/8 | rs2230199_C | 0.9470 | 0.972 | 0.419 | 2.256 |
| DR4/8 | rs2857009_C | 0.7339 | 0.896 | 0.477 | 1.684 |
| DR4/8 | rs4308977_G | 0.9823 | 0.991 | 0.435 | 2.255 |
| DR4/8 | rs4597342_A | 0.9602 | 0.982 | 0.484 | 1.995 |
| DR4/8 | rs4844573_G | 0.1782 | 0.670 | 0.373 | 1.201 |
| DR4/8 | rs665691_C  | 0.4927 | 1.151 | 0.770 | 1.721 |
| DR4/8 | rs7029078_G | 0.4821 | 0.762 | 0.356 | 1.628 |
| DR4/8 | rs7951_A    | 0.8030 | 0.859 | 0.259 | 2.845 |
| DR4/8 | rs9332739_C | 0.5119 | 0.519 | 0.073 | 3.680 |
